# Supplementary material
Source: MDPI journal article supplement (https://www.mdpi.com/2071-1050/14/13/8060)
Supplement: s1 [file s1]

Archive with 1 entries (1 files):
- sustainability-1782643-supplementary.pdf
